# Supplementary material for: Genomic Variability of Mycobacterium tuberculosis Strains of the Euro-American Lineage Based on Large Sequence Deletions and 15-Locus MIRU-VNTR Polymorphism
Source: PubMed Central journal article supplement (PMC4157836; doi:10.1371/journal.pone.0107150), 2014-09-08

Figure S1

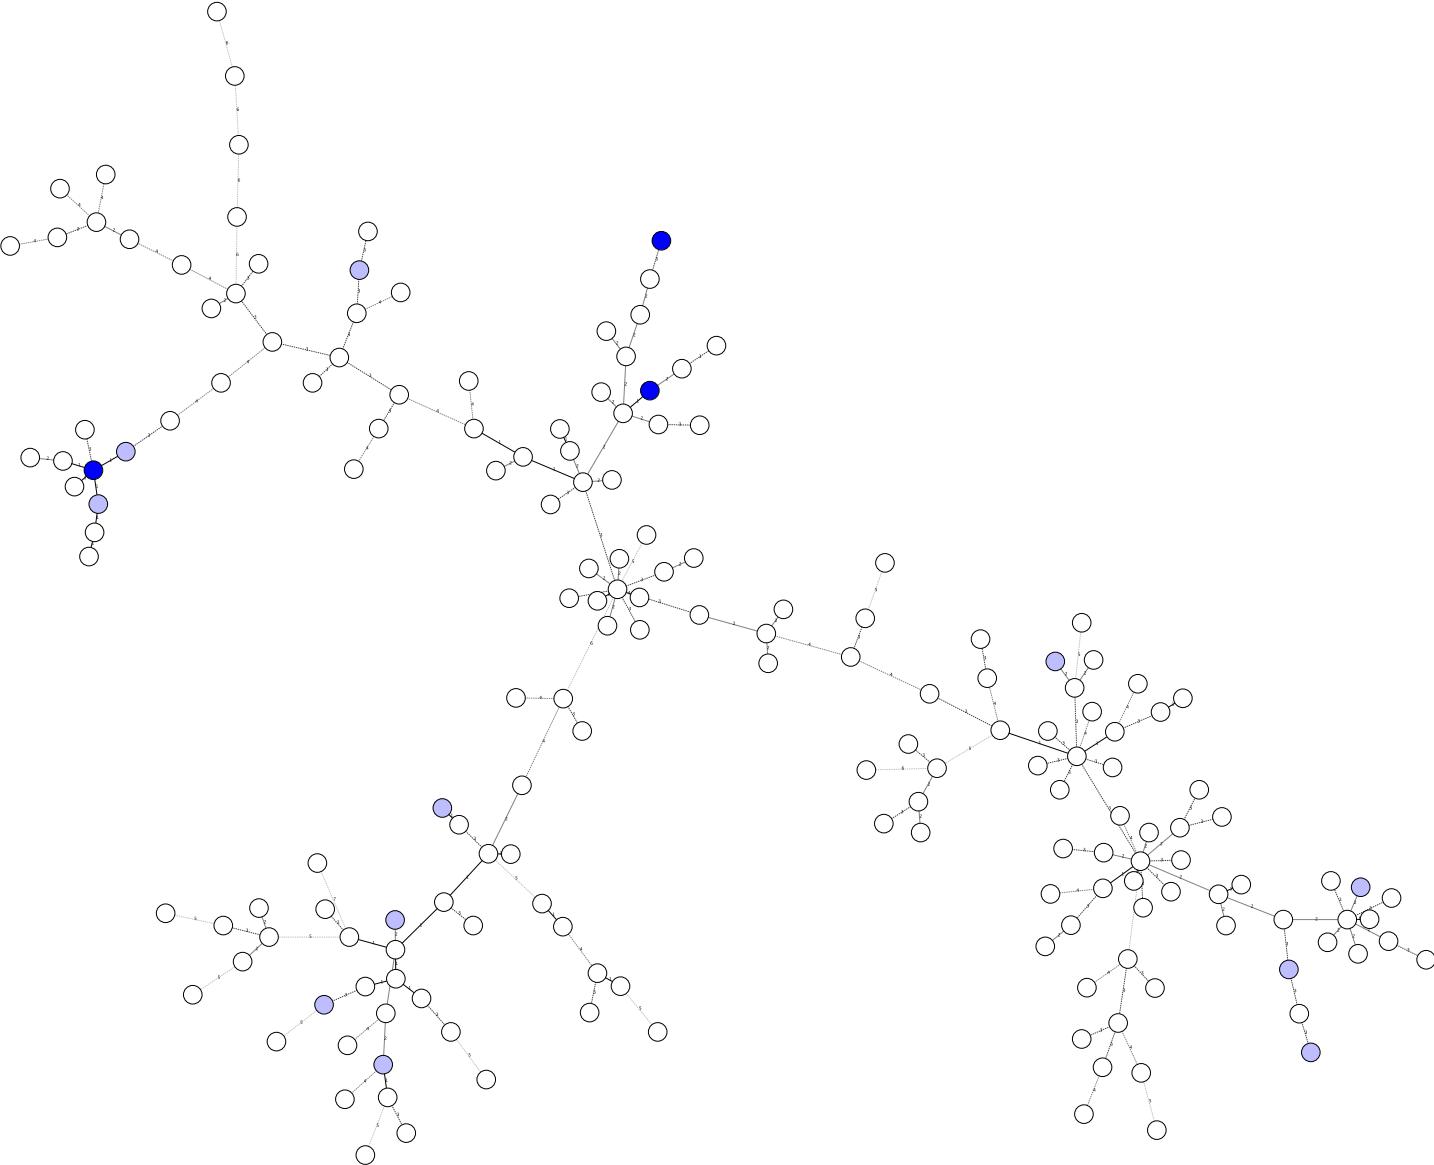

Supplement: pone.0107150.s001.pdf [file pone.0107150.s001.pdf]
